# Supplementary material for: Immunogenic amino acid motifs and linear epitopes of COVID-19 mRNA vaccines
Source: PubMed Central journal article supplement (PMC8428655; doi:10.1371/journal.pone.0252849), 2021-09-09
Supplement: pone.0252849.s001.pdf [file pone.0252849.s001.pdf]

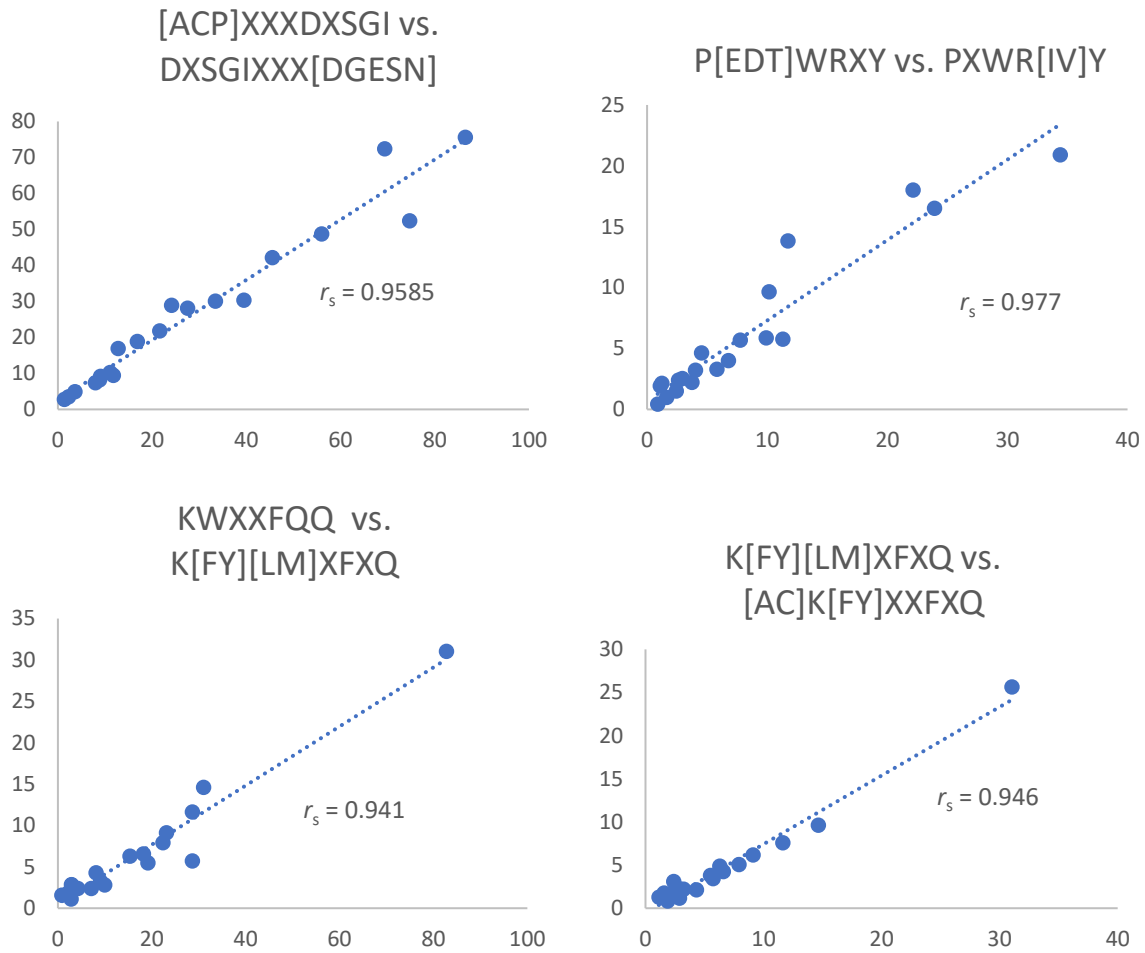

S1 Fig. Correlation of IgG recognition of peptide motifs with overlapping amino acids. The fold enrichment in IgG with specificity for the different pairs of amino acid motifs (respective x and Y-axis) are shown along with the Spearman rank correlation ( $r_s$ ) value. Each symbol represents a different COVID-19 mRNA vaccine recipient. Trend lines were fitted by linear regression. Spearman rank correlation ( $r_s$ ) is displayed.
