# Supplementary material for: Immunogenic amino acid motifs and linear epitopes of COVID-19 mRNA vaccines
Source: PubMed Central journal article supplement (PMC8428655; doi:10.1371/journal.pone.0252849), 2021-09-09
Supplement: pone.0252849.s008.pdf [file pone.0252849.s008.pdf]

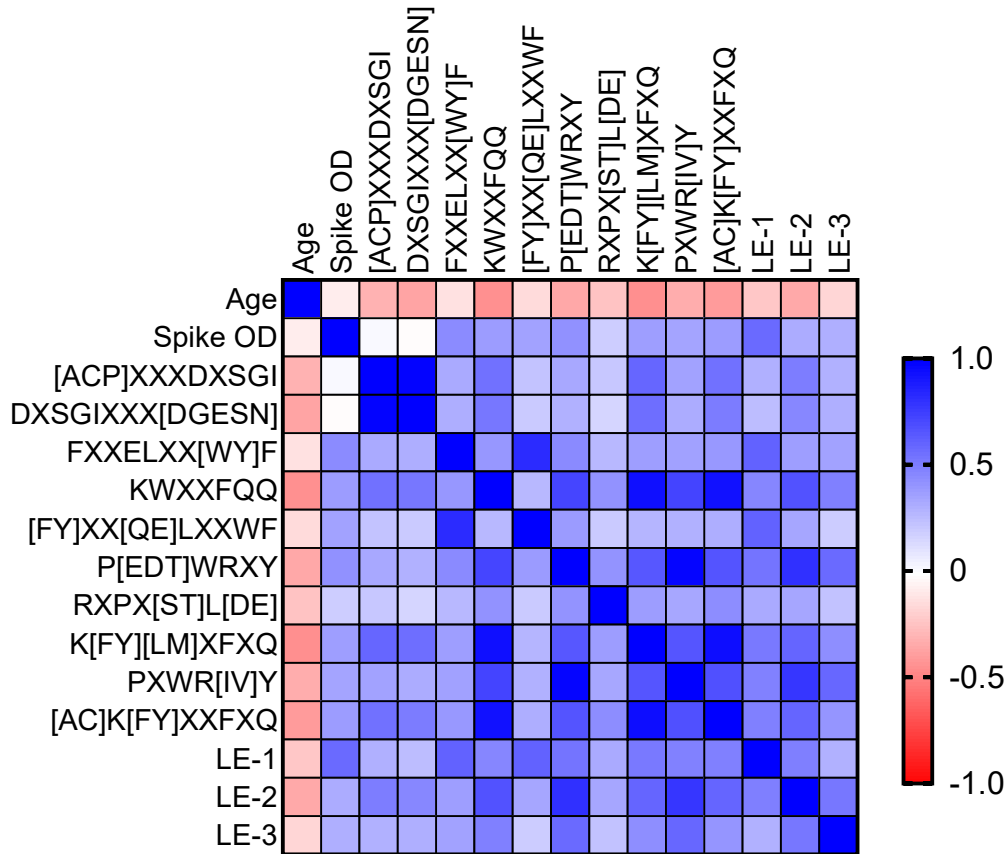

S1 Correlation Matrix. The correlation between enrichment in IgG recognition of amino acid motifs and linear epitopes. Spearman rank correlation values are displayed as a heat map by color according to key on right for different epitopes recognized by IgG from COVID-19 mRNA vaccine recipients.
